# Supplementary material
Source: PubMed Central journal article supplement (PMC4794050)
Supplement: chah022225.ww1_default.pdf [file chah022225.ww1_default.pdf]

## Appendix 1: Administrative codes adopted to define conditions

Table 1. Administrative codes used to identify diagnosis of gastrointestinal bleeding.

| <b>ICD-9 Code</b>                                                                                                                                                                                                                                                                                                                                                                                                                                                     |                                          |
|-----------------------------------------------------------------------------------------------------------------------------------------------------------------------------------------------------------------------------------------------------------------------------------------------------------------------------------------------------------------------------------------------------------------------------------------------------------------------|------------------------------------------|
| 531                                                                                                                                                                                                                                                                                                                                                                                                                                                                   | Gastric ulcer                            |
| 532                                                                                                                                                                                                                                                                                                                                                                                                                                                                   | Duodenal ulcer                           |
| 533                                                                                                                                                                                                                                                                                                                                                                                                                                                                   | Peptic ulcer site unspecified*           |
| 534                                                                                                                                                                                                                                                                                                                                                                                                                                                                   | Gastrojejunal ulcer                      |
| 569.82                                                                                                                                                                                                                                                                                                                                                                                                                                                                | Ulceration of intestine                  |
| 569.83                                                                                                                                                                                                                                                                                                                                                                                                                                                                | Perforation of intestine                 |
| 578                                                                                                                                                                                                                                                                                                                                                                                                                                                                   | Gastrointestinal hemorrhage†             |
| 562                                                                                                                                                                                                                                                                                                                                                                                                                                                                   | Diverticula of intestine                 |
| <b>Current Procedural Terminology Code</b>                                                                                                                                                                                                                                                                                                                                                                                                                            |                                          |
| 43200, 43201, 43202, 43204, 43205, 43215, 43217, 43219, 43220, 43226, 43227, 43228, 43231, 43232, 43234, 43235, 43236, 43237, 43238, 43239, 43241, 43242, 43243, 43244, 43245, 43246, 43247, 43248, 43249, 43250, 43251, 43255, 43256, 43257, 43258, 44300, 44310, 44312, 44314, 44316, 44320, 44340, 44345, 44346, 44360, 44361, 44364, 44365, 44366, 44369, 44372, 44373, 44376, 44377, 44378, 44380, 44382, 44383, 44386, 44388, 44389, 44391, 44392, 44393, 44394 | Upper gastrointestinal surgery/procedure |
| 44389, 44391, 44392, 44393, 44394, 45300, 45305, 45307, 45308, 45309, 45315, 45317, 45320, 45330, 45331, 45333, 45334, 45335, 45355, 45378, 45379, 45380, 45381, 45382, 45383, 45384, 45385, 82270, 82271, 82272, A4773, G0394                                                                                                                                                                                                                                        | Lower gastrointestinal surgery/procedure |

\* along with an upper gastrointestinal surgery or procedure within 7 days of the ICD code.

† along with an upper or lower gastrointestinal surgery or procedure within 7 days of the ICD code.

ICD-9 = International Classification of Diseases, Ninth Revision.

Table 2. Administrative codes used to identify diagnosis of co-existing conditions at the baseline.

| <b>ICD-9 Code</b>                          | <b>Conditions</b>                                                                    |
|--------------------------------------------|--------------------------------------------------------------------------------------|
| <b><i>Chronic kidney disease (585)</i></b> |                                                                                      |
| 585.1                                      | Chronic kidney disease, Stage I                                                      |
| 585.2                                      | Chronic kidney disease, Stage II (mild)                                              |
| 585.3                                      | Chronic kidney disease, Stage III (moderate)                                         |
| 585.4                                      | Chronic kidney disease, Stage IV (severe)                                            |
| 585.5                                      | Chronic kidney disease, Stage V                                                      |
| 585.6                                      | End stage renal disease                                                              |
| 585.9                                      | Chronic kidney disease, unspecified                                                  |
| <b><i>Trauma (800-959)</i></b>             |                                                                                      |
| <b><i>800-804</i></b>                      | <b><i>Fracture of Skull</i></b>                                                      |
| 800                                        | Fracture of vault of skull                                                           |
| 801                                        | Fracture of base of skull                                                            |
| 802                                        | Fracture of face bones                                                               |
| 803                                        | Other and unspecified skull fractures                                                |
| 804                                        | Multiple fractures involving skull or face with other bones                          |
| <b><i>805-809</i></b>                      | <b><i>Fracture Of Spine And Trunk</i></b>                                            |
| 805                                        | Fracture of vertebral column without mention of spinal cord injury                   |
| 806                                        | Fracture of vertebral column with spinal cord injury                                 |
| 807                                        | Fracture of rib(s) sternum larynx and trachea                                        |
| 808                                        | Fracture of pelvis                                                                   |
| 809                                        | Ill-defined fractures of bones of trunk                                              |
| <b><i>810-819</i></b>                      | <b><i>Fracture Of Upper Limb</i></b>                                                 |
| 810                                        | Fracture of clavicle                                                                 |
| 811                                        | Fracture of scapula                                                                  |
| 812                                        | Fracture of humerus                                                                  |
| 813                                        | Fracture of radius and ulna                                                          |
| 814                                        | Fracture of carpal bone(s)                                                           |
| 815                                        | Fracture of metacarpal bone(s)                                                       |
| 816                                        | Fracture of one or more phalanges of hand                                            |
| 817                                        | Multiple fractures of hand bones                                                     |
| 818                                        | Ill-defined fractures of upper limb                                                  |
| 819                                        | Multiple fractures involving both upper limbs and upper limb with rib(s) and sternum |
| <b><i>820-829</i></b>                      | <b><i>Fracture of Lower Limb</i></b>                                                 |
| 820                                        | Fracture of neck of femur                                                            |
| 821                                        | Fracture of other and unspecified parts of femur                                     |
| 822                                        | Fracture of patella                                                                  |
| 823                                        | Fracture of tibia and fibula                                                         |
| 824                                        | Fracture of ankle                                                                    |
| 825                                        | Fracture of one or more tarsal and metatarsal bones                                  |
| 826                                        | Fracture of one or more phalanges of foot                                            |
| 827                                        | Other multiple and ill-defined fractures of lower limb                               |
| 828                                        | Multiple fractures involving both lower limbs lower with upper limb                  |

|         |                                                                  |
|---------|------------------------------------------------------------------|
|         | and lower limb(s) with rib(s) and sternum                        |
| 829     | Fracture of unspecified bones                                    |
| 830-839 | <i>Dislocation</i>                                               |
| 830     | Dislocation of jaw                                               |
| 831     | Dislocation of shoulder                                          |
| 832     | Dislocation of elbow                                             |
| 833     | Dislocation of wrist                                             |
| 834     | Dislocation of finger                                            |
| 835     | Dislocation of hip                                               |
| 836     | Dislocation of knee                                              |
| 837     | Dislocation of ankle                                             |
| 838     | Dislocation of foot                                              |
| 839     | Other multiple and ill-defined dislocations                      |
| 840-848 | <i>Sprains And Strains Of Joints And Adjacent Muscles</i>        |
| 840     | Sprains and strains of shoulder and upper arm                    |
| 841     | Sprains and strains of elbow and forearm                         |
| 842     | Sprains and strains of wrist and hand                            |
| 843     | Sprains and strains of hip and thigh                             |
| 844     | Sprains and strains of knee and leg                              |
| 845     | Sprains and strains of ankle and foot                            |
| 846     | Sprains and strains of sacroiliac region                         |
| 847     | Sprains and strains of other and unspecified parts of back       |
| 848     | Other and ill-defined sprains and strains                        |
| 850-854 | <i>Intracranial Injury, Excluding Those With Skull Fracture</i>  |
| 850     | Concussion                                                       |
| 851     | Cerebral laceration and contusion                                |
| 852     | Subarachnoid subdural and extradural hemorrhage following injury |
| 853     | Other and unspecified intracranial hemorrhage following injury   |
| 854     | Intracranial injury of other and unspecified nature              |
| 860-869 | <i>Internal Injury Of Chest, Abdomen, And Pelvis</i>             |
| 860     | Traumatic pneumothorax and hemothorax                            |
| 861     | Injury to heart and lung                                         |
| 862     | Injury to other and unspecified intrathoracic organs             |
| 863     | Injury to gastrointestinal tract                                 |
| 864     | Injury to liver                                                  |
| 865     | Injury to spleen                                                 |
| 866     | Injury to kidney                                                 |
| 867     | Injury to pelvic organs                                          |
| 868     | Injury to other intra-abdominal organs                           |
| 869     | Internal injury to unspecified or ill-defined organs             |
| 870-879 | <i>Open Wound Of Head, Neck, And Trunk</i>                       |
| 870     | Open wound of ocular adnexa                                      |
| 871     | Open wound of eyeball                                            |
| 872     | Open wound of ear                                                |
| 873     | Other open wound of head                                         |
| 874     | Open wound of neck                                               |

|         |                                                                                       |
|---------|---------------------------------------------------------------------------------------|
| 875     | Open wound of chest (wall)                                                            |
| 876     | Open wound of back                                                                    |
| 877     | Open wound of buttock                                                                 |
| 878     | Open wound of genital organs (external) including traumatic amputation                |
| 879     | Open wound of other and unspecified sites except limbs                                |
| 880-887 | <i>Open Wound Of Upper Limb</i>                                                       |
| 880     | Open wound of shoulder and upper arm                                                  |
| 881     | Open wound of elbow forearm and wrist                                                 |
| 882     | Open wound of hand except finger(s) alone                                             |
| 883     | Open wound of finger(s)                                                               |
| 884     | Multiple and unspecified open wound of upper limb                                     |
| 885     | Traumatic amputation of thumb (complete) (partial)                                    |
| 886     | Traumatic amputation of other finger(s) (complete) (partial)                          |
| 887     | Traumatic amputation of arm and hand (complete) (partial)                             |
| 890-897 | <i>Open Wound Of Lower Limb</i>                                                       |
| 890     | Open wound of hip and thigh                                                           |
| 891     | Open wound of knee leg (except thigh) and ankle                                       |
| 892     | Open wound of foot except toe(s) alone                                                |
| 893     | Open wound of toe(s)                                                                  |
| 894     | Multiple and unspecified open wound of lower limb                                     |
| 895     | Traumatic amputation of toe(s) (complete) (partial)                                   |
| 896     | Traumatic amputation of foot (complete) (partial)                                     |
| 897     | Traumatic amputation of leg(s) (complete) (partial)                                   |
| 900-904 | <i>Injury to Blood Vessels</i>                                                        |
| 900     | Injury to blood vessels of head and neck                                              |
| 901     | Injury to blood vessels of thorax                                                     |
| 902     | Injury to blood vessels of abdomen and pelvis                                         |
| 903     | Injury to blood vessels of upper extremity                                            |
| 904     | Injury to blood vessels of lower extremity and unspecified sites                      |
| 905-909 | <i>Late Effects Of Injuries, Poisonings, Toxic Effects, And Other External Causes</i> |
| 905     | Late effects of musculoskeletal and connective tissue injuries                        |
| 906     | Late effects of injuries to skin and subcutaneous tissues                             |
| 907     | Late effects of injuries to the nervous system                                        |
| 908     | Late effects of other and unspecified injuries                                        |
| 909     | Late effects of other and unspecified external causes                                 |
| 910-919 | <i>Superficial Injury</i>                                                             |
| 910     | Superficial injury of face neck and scalp except eye                                  |
| 911     | Superficial injury of trunk                                                           |
| 912     | Superficial injury of shoulder and upper arm                                          |
| 913     | Superficial injury of elbow forearm and wrist                                         |
| 914     | Superficial injury of hand(s) except finger(s) alone                                  |
| 915     | Superficial injury of finger(s)                                                       |
| 916     | Superficial injury of hip thigh leg and ankle                                         |
| 917     | Superficial injury of foot and toe(s)                                                 |

|         |                                                                         |
|---------|-------------------------------------------------------------------------|
| 918     | Superficial injury of eye and adnexa                                    |
| 919     | Superficial injury of other multiple and unspecified sites              |
| 920-924 | <i>Contusion With Intact Skin Surface</i>                               |
| 920     | Contusion of face, scalp, and neck except eye(s)                        |
| 921     | Contusion of eye and adnexa                                             |
| 922     | Contusion of trunk                                                      |
| 923     | Contusion of upper limb                                                 |
| 924     | Contusion of lower limb and of other and unspecified sites              |
| 925-929 | <i>Crushing Injury</i>                                                  |
| 925     | Crushing injury of face scalp and neck                                  |
| 926     | Crushing injury of trunk                                                |
| 927     | Crushing injury of upper limb                                           |
| 928     | Crushing injury of lower limb                                           |
| 929     | Crushing injury of multiple and unspecified sites                       |
| 930-939 | <i>Effects Of Foreign Body Entering Through Orifice</i>                 |
| 930     | Foreign body on external eye                                            |
| 931     | Foreign body in ear                                                     |
| 932     | Foreign body in nose                                                    |
| 933     | Foreign body in pharynx and larynx                                      |
| 934     | Foreign body in trachea bronchus and lung                               |
| 935     | Foreign body in mouth esophagus and stomach                             |
| 936     | Foreign body in intestine and colon                                     |
| 937     | Foreign body in anus and rectum                                         |
| 938     | Foreign body in digestive system, unspecified                           |
| 939     | Foreign body in genitourinary tract                                     |
| 940-949 | <i>Burns</i>                                                            |
| 940     | Burn confined to eye and adnexa                                         |
| 941     | Burn of face head and neck                                              |
| 942     | Burn of trunk                                                           |
| 943     | Burn of upper limb except wrist and hand                                |
| 944     | Burn of wrist(s) and hand(s)                                            |
| 945     | Burn of lower limb(s)                                                   |
| 946     | Burns of multiple specified sites                                       |
| 947     | Burn of internal organs                                                 |
| 948     | Burns classified according to extent of body surface involved           |
| 950-957 | <i>Injury To Nerves And Spinal Cord</i>                                 |
| 950     | Injury to optic nerve and pathways                                      |
| 951     | Injury to other cranial nerve(s)                                        |
| 952     | Spinal cord injury without evidence of spinal bone injury               |
| 953     | Injury to nerve roots and spinal plexus                                 |
| 954     | Injury to other nerve(s) of trunk excluding shoulder and pelvic girdles |
| 955     | Injury to peripheral nerve(s) of shoulder girdle and upper limb         |
| 956     | Injury to peripheral nerve(s) of pelvic girdle and lower limb           |
| 957     | Injury to other and unspecified nerves                                  |
| 958-959 | <i>Certain Traumatic Complications And Unspecified Injuries</i>         |
| 958     | Certain early complications of trauma                                   |

|                                  |                                           |
|----------------------------------|-------------------------------------------|
| 959                              | Injury other and unspecified              |
| <b><i>H pylori infection</i></b> |                                           |
| 041.86                           | Helicobacter pylori (H. pylori) infection |

ICD-9 = International Classification of Diseases, Ninth Revision.

**Appendix 2: Standardized Differences between groups before and after the application of ATT weighting**

|                                       | Original Sample         |                          | ATT Weighting           |                          |
|---------------------------------------|-------------------------|--------------------------|-------------------------|--------------------------|
|                                       | Dabigatran vs. Warfarin | Rivaroxaban vs. Warfarin | Dabigatran vs. Warfarin | Rivaroxaban vs. Warfarin |
| <b>Age Group</b>                      |                         |                          |                         |                          |
| Continuous                            | 0.358                   | 0.022                    | -0.047                  | -0.043                   |
| 18-44                                 | -0.294                  | -0.216                   | 0.012                   | 0.003                    |
| 45-64                                 | -0.146                  | 0.066                    | 0.015                   | 0.003                    |
| 55-64                                 | 0.088                   | 0.181                    | 0.011                   | -0.003                   |
| 65+                                   | 0.233                   | -0.123                   | -0.030                  | -0.001                   |
| Female                                | -0.333                  | 0.092                    | 0.002                   | -0.005                   |
| <b>Region</b>                         |                         |                          |                         |                          |
| East                                  | -0.019                  | -0.274                   | -0.005                  | -0.002                   |
| Mid-West                              | -0.158                  | -0.070                   | 0.004                   | -0.001                   |
| South                                 | 0.186                   | 0.304                    | -0.002                  | 0.003                    |
| West                                  | -0.037                  | -0.157                   | 0.002                   | -0.003                   |
| <b>Clinical/Medication Indicators</b> |                         |                          |                         |                          |
| Renal Failure                         | -0.040                  | -0.162                   | -0.005                  | -0.003                   |
| Trauma                                | -0.261                  | 0.101                    | 0.005                   | -0.010                   |
| Helicobacter Pylori infection         | 0.019                   | 0.010                    | 0.002                   | 0.000                    |
| <b>Bleeding Risk</b>                  |                         |                          |                         |                          |
| HAS_BLED score                        | 0.242                   | -0.013                   | -0.045                  | 0.001                    |
| <b>CCS</b>                            |                         |                          |                         |                          |
| Continuous                            | -0.291                  | -0.166                   | 0.003                   | -0.004                   |
| <=5                                   | 0.098                   | -0.210                   | 0.001                   | -0.032                   |
| 6-10                                  | 0.172                   | 0.102                    | 0.009                   | 0.003                    |
| 11-15                                 | -0.006                  | 0.245                    | -0.009                  | 0.032                    |
| 16-20                                 | -0.097                  | -0.006                   | -0.021                  | -0.022                   |
| 21-25                                 | -0.129                  | -0.083                   | -0.008                  | 0.024                    |
| >=26                                  | -0.185                  | -0.306                   | 0.044                   | -0.035                   |
| NSAID use                             | -0.211                  | 0.428                    | 0.013                   | -0.011                   |
| PPI use                               | -0.022                  | -0.009                   | -0.003                  | 0.000                    |
| Steroid use                           | -0.081                  | -0.077                   | 0.003                   | -0.001                   |

CCS=clinical classification system; NSAID=non-steroidal anti-inflammatory drug; PPI=proton pump inhibitor



**Appendix 3: Hazard Ratios of all variables included in the Cox Proportional Hazard Models**

|                                       | Dabigatran (ref: Warfarin) | Rivaroxaban (ref: Warfarin) |
|---------------------------------------|----------------------------|-----------------------------|
| N                                     | 44,514                     | 41,256                      |
| Warfarin                              | 1                          | 1                           |
| Exposure<br>(Dabigatran/ Rivaroxaban) | 1.21<br>(0.96–1.53)        | 0.98<br>(0.36-2.69)         |
| Sex                                   |                            |                             |
| Male                                  | 1                          | 1                           |
| Female                                | 0.64**<br>(0.49 – 0.85)    | 0.43**<br>(0.25 – 0.71)     |
| Region of Residence                   |                            |                             |
| South                                 | 1                          | 1                           |
| East                                  | 1.15<br>(0.78 – 1.69)      | 1.50<br>(0.85 – 2.62)       |
| Mid-West                              | 1.15<br>(0.87 – 1.52)      | 1.66<br>(0.86 – 3.18)       |
| West                                  | 0.89<br>(0.60 – 1.32)      | 0.85<br>(0.47 – 1.52)       |
| Co-morbidity and co-medications       |                            |                             |
| Use of PPI                            | 0.87<br>(0.65 – 1.16)      | 1.59<br>(0.87 – 2.90)       |
| Use of Steroids                       | 1.19<br>(0.85 – 1.66)      | 1.09<br>(0.58 – 2.05)       |
| Renal Failure                         | 0.82<br>(0.46 – 1.47)      | 4.10*<br>(1.09 – 15.4)      |
| Trauma                                | 0.77<br>(0.53 – 1.11)      | 0.66<br>(0.39 – 1.11)       |

---

|                    |                       |                         |
|--------------------|-----------------------|-------------------------|
| H Pylori infection | 0.01**<br>(0.00-0.04) | 0.05**<br>(0.01 – 0.41) |
|--------------------|-----------------------|-------------------------|

---

\*:  $p \leq 0.05$ , \*\*:  $p \leq 0.01$

Age groups, CCS categories, and NSAID use as stratification factors and others as regression covariates

**Appendix 4: Hazard Ratios Derived from Cox Proportional Hazard Models with Different Covariates-inclusion Methods**

|                          | Dabigatran (ref: Warfarin) | Rivaroxaban (ref: Warfarin) |
|--------------------------|----------------------------|-----------------------------|
| N                        | 44,514                     | 41,256                      |
| Crude HR <sup>1</sup>    | 1.20<br>(0.96–1.52)        | 0.95<br>(0.31–2.94)         |
| Adjusted HR <sup>2</sup> | 1.20<br>(0.95–1.52)        | 0.95<br>(0.32–2.86)         |
| Adjusted HR <sup>3</sup> | 1.21<br>(0.96–1.53)        | 0.98<br>(0.36–2.69)         |
| Adjusted HR <sup>4</sup> | 1.29*<br>(1.00–1.65)       | 1.06<br>(0.34–3.30)         |

\*:  $p \leq 0.10$  \*\*:  $p \leq 0.05$

<sup>1</sup>: No control variables

<sup>2</sup>: All control variables as regression covariates

<sup>3</sup>: Age groups, CCS categories, and NSAID use as stratification factors and others as regression covariates

<sup>4</sup>: All control variables as stratification factors

**Appendix 5: Hazard Ratios Derived from Cox Proportional Hazard Models with Different Wash-out Periods**

|                          | Dabigatran (ref: Warfarin) | Rivaroxaban (ref: Warfarin) |
|--------------------------|----------------------------|-----------------------------|
| N                        | 44,514                     | 41,256                      |
| Wash-out Period: 7 Days  |                            |                             |
| Crude HR <sup>1</sup>    | 1.21<br>(0.94–1.56)        | 0.83<br>(0.22–3.12)         |
| Adjusted HR <sup>2</sup> | 1.25*<br>(0.97–1.62)       | 0.76<br>(0.24–2.42)         |
| Wash-out Period: 14 Days |                            |                             |
| Crude HR <sup>1</sup>    | 1.20<br>(0.96–1.52)        | 0.95<br>(0.31–2.94)         |
| Adjusted HR <sup>2</sup> | 1.21<br>(0.96–1.53)        | 0.98<br>(0.36–2.69)         |
| Wash-out Period: 30 Days |                            |                             |
| Crude HR <sup>1</sup>    | 1.22*<br>(0.99–1.51)       | 0.89<br>(0.33–2.41)         |
| Adjusted HR <sup>2</sup> | 1.13<br>(0.91–1.40)        | 0.99<br>(0.40–2.47)         |
| Wash-out Period: 45 Days |                            |                             |
| Crude HR <sup>1</sup>    | 1.23**<br>(1.01–1.50)      | 0.85<br>(0.35–2.08)         |
| Adjusted HR <sup>2</sup> | 1.11<br>(0.91–1.36)        | 1.10<br>(0.47–2.56)         |

\*: p≤0.10 \*\*: p≤0.05

<sup>1</sup>: No control variables

<sup>2</sup>: Age groups, CCS categories and NSAID use as stratification factors and others as regression covariates

**Appendix 6: Hazard Ratios Derived from Cox Proportional Hazard Models Censoring GI Bleeding from Hospitalization Records**

|                          | Dabigatran (ref: Warfarin) | Rivaroxaban (ref: Warfarin) |
|--------------------------|----------------------------|-----------------------------|
| <b>All Sample</b>        |                            |                             |
| N                        | 44,514                     | 41,256                      |
| Crude HR <sup>1</sup>    | 1.18<br>(0.91–1.51)        | 1.34<br>(0.41–4.36)         |
| Adjusted HR <sup>2</sup> | 1.19<br>(0.91–1.54)        | 1.36<br>(0.49–3.75)         |
| <b>Non-Elderly</b>       |                            |                             |
| N                        | 34,038                     | 32,099                      |
| Crude HR <sup>1</sup>    | 1.26<br>(0.90–1.75)        | 1.71<br>(0.37–7.83)         |
| Adjusted HR <sup>2</sup> | 1.26<br>(0.90–1.77)        | 1.52<br>(0.50–4.60)         |
| <b>Elderly</b>           |                            |                             |
| N                        | 10,476                     | 9,157                       |
| Crude HR <sup>1</sup>    | 1.08<br>(0.73–1.60)        | 0.80<br>(0.12–5.38)         |
| Adjusted HR <sup>2</sup> | 1.08<br>(0.73–1.62)        | 0.67<br>(0.22–2.04)         |

<sup>1</sup>: No control variables

<sup>2</sup>: Age groups, CCS categories and NSAID use as stratification factors and others as regression covariates

**Appendix 7: Hazard Ratios Derived from Cox Proportional Hazard Models Adding the HAS-BLED Risk Score**

|                           | Dabigatran (ref: Warfarin) | Rivaroxaban (ref: Warfarin) |
|---------------------------|----------------------------|-----------------------------|
| <b><i>All Sample</i></b>  |                            |                             |
| N                         | 44,514                     | 41,256                      |
| Adjusted HR <sup>1</sup>  | 1.21<br>(0.96–1.53)        | 0.98<br>(0.36–2.67)         |
| <b><i>Non-Elderly</i></b> |                            |                             |
| N                         | 34,038                     | 32,099                      |
| Adjusted HR <sup>1</sup>  | 1.35<br>(0.99–1.84)        | 1.03<br>(0.34–3.17)         |
| <b><i>Elderly</i></b>     |                            |                             |
| N                         | 10,476                     | 9,157                       |
| Adjusted HR <sup>1</sup>  | 1.08<br>(0.76–1.54)        | 0.62<br>(0.18–2.09)         |

<sup>1</sup>: Age groups, CCS categories and NSAID use as stratification factors and others as regression covariates

**Appendix 8: Cohort exit reason by drug type**

| Exit reason                    | Dabigatran | Rivaroxaban | Warfarin |
|--------------------------------|------------|-------------|----------|
| Inpatient                      | 13.23%     | 12.13%      | 15.52%   |
| Bleeding                       | 2.49%      | 0.24%       | 1.60%    |
| Loss of enrollment             | 15.02%     | 8.37%       | 10.36%   |
| End of observation             | 19.16%     | 19.16%      | 11.80%   |
| Loss of continuous RX exposure | 46.30%     | 59.43%      | 59.40%   |
| Switch drug                    | 3.81%      | 0.67%       | 1.32%    |
